# Supplementary material for: A bimetallic sulfide FeCoS4@rGO hybrid as a high-performance anode for potassium-ion batteries
Source: Royal Society of Chemistry journal article supplement (doi:10.1039/d4cc01026d), 2024-01-01
Supplement: d4cc01026d1.pdf [file d4cc01026d1.pdf]

# Bimetallic Sulfide FeCoS<sub>4</sub>@rGO Hybrid as A High-Performance Anode for Potassium-ion Batteries

Erjin Zhang<sup>a</sup>, Yuanning Luo<sup>a</sup>, Hongwei Fu<sup>b</sup>, Zhentao Luo<sup>a</sup>, Peng Wang<sup>a</sup>, Xuejiao Wang<sup>\*a</sup>, Li Xu<sup>\*a</sup>, Huaming Li<sup>a</sup>

a. Institute for Energy Research, School of Mechanical Engineering, Jiangsu University, Zhenjiang 212013, People's Republic of China

b. School of Physics and Electronics, Hunan University, Changsha 410082, People's Republic of China

\* Corresponding authors. E-mail: [wangxuejiao@ujs.edu.cn](mailto:wangxuejiao@ujs.edu.cn)

## Experimental Section

### 1. Chemicals and materials

The Ferric chloride hexahydrate (FeCl<sub>3</sub>•6 H<sub>2</sub>O), Cobalt chloride hexahydrate (CoCl<sub>2</sub>•6 H<sub>2</sub>O), Sulfur (S, 99.5%), Ammonium hydroxide (NH<sub>3</sub>•H<sub>2</sub>O), ethanol (EtOH, 99.8%), and graphene oxide (GO) were purchased from Sinopharm Chemical Reagent Co. Ltd., Shanghai, China.

### 2. Material Preparation

*Preparation of FeCoS<sub>4</sub>@rGO:* Initially, 0.5406 g FeCl<sub>3</sub>•6 H<sub>2</sub>O and 0.4758 g CoCl<sub>2</sub>•6 H<sub>2</sub>O were added to the 90 ml deionized water and stir until completely dissolved. Subsequently, 10 ml of NH<sub>3</sub>•H<sub>2</sub>O was added, and the mixture was stirred at 90 °C for 4 hours. After the solution naturally cooled down, the precipitate was collected by centrifugation and dried at 60 °C for 12 hours.

0.2 g precursor and 0.2 g sulfur powder were thoroughly mixed in a mortar. Subsequently, the mixture was annealed at 155 °C for 2 hours with a heating rate of 5 °C min<sup>-1</sup> under an argon (Ar) atmosphere. The temperature was then increased to 450 °C (or alternatively, to 350 °C, 650 °C) at the same rate and held for 3 hours. Finally, the bimetallic sulfide FeCoS<sub>4</sub> (or FeCoS<sub>2</sub>) was obtained. FeCoS<sub>4</sub>@rGO was prepared by adding a solution of 0.75 mg/ml graphene oxide to the precursor solution.

### 3. Material characterization

Bimetallic sulfide was characterized by field-emission SEM (Tescan Mira4) and

TEM (FEI Talos F200S). X-ray powder diffraction (XRD, XRD 6100 (Cu K $\alpha$ )) was used to examine the crystal structure of the sample. Raman spectra was obtained by using a confocal Raman microscope system (WITec, alpha 300 R) with a 532 nm wavelength yttrium aluminum garnet (YAG) laser. X-ray photoelectron spectroscopy (XPS) was performed using the Thermo Scientific K-Alpha + from a single anode at 72 W. Thermal gravimetric analysis (TGA) was carried out on a Microcomputer differential thermal balance (HCT-1) under nitrogen atmospheres, respectively.

#### *4. Electrochemical Measurements*

The active material was mixed with Ketjen black and carboxymethylcellulose (CMC) binder with mass ratio of 7:2:1 and dissolved in distilled water solvent to produce electrode slurry by continuous agitation for 8 h. The slurry was uniformly pasted onto copper foil current collector. The electrodes were dried in a vacuum oven at 60 °C overnight. CR2032 Coin cells were assembled in glove box (<1 ppm of water and oxygen) with counter electrode (potassium metal) and electrolyte (3M KFSI in DME). The loading mass of active material is about 1.0 mg cm<sup>-2</sup>. The assembled coin cell was tested at various current densities over the range of 0.01–3.0 V with Neware BTS-8.0.0 battery testing system. CV measurements were performed on a CHI660e electrochemical workstation (Chenhua, Shanghai) at 0.1 mV s<sup>-1</sup> from 0.01 to 3.0 V.

Galvanostatic Intermittent Titration Technique (GITT) tests were utilized to investigate the reaction kinetics of K ion storage. The experiment employed a current density of 50 mA g<sup>-1</sup> with a pulse time of 30 minutes, followed by relaxation intervals of equal duration across the entire range of relevant voltages.

#### *5. Calculated method*

All the density functional theories (DFT) calculations were conducted based on the Vienna Ab-initio Simulation Package (VASP)<sup>1</sup>. The exchange-correlation effects were described by the Perdew-Burke-Ernzerhof (PBE) functional within the generalized gradient approximation (GGA) method<sup>2</sup>. The core-valence interactions were accounted by the projected augmented wave (PAW) method<sup>3</sup>. The energy cutoff for plane wave expansions was set to 400 eV. The structural optimization was completed for energy and force convergence set at 1.0 $\times$ 10<sup>-5</sup> eV and 0.02 eV Å<sup>-1</sup>,

respectively. The Brillouin zone was sampled with the  $3 \times 3 \times 1$  K-point. Grimme's DFT-D3 methodology was used to describe the dispersion interactions<sup>4</sup>.

The adsorption energies ( $E_{\text{ads}}$ ) are calculated by:

$$E_{\text{ads}} = E_{*K} - E_K - E_{\text{Sub}}$$

where  $E_K$  and  $E_{*K}$  represent the energies before and after the adsorption of K on the substrate, respectively.  $E_{\text{sub}}$  is the energy of clean surface.

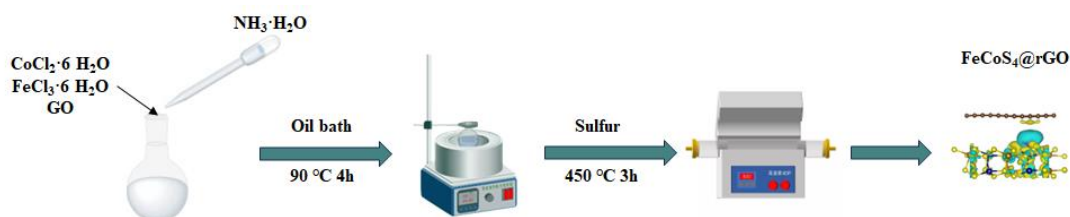

Fig. S1 Schematic illustration of the synthesis process of FeCoS<sub>4</sub>@rGO.

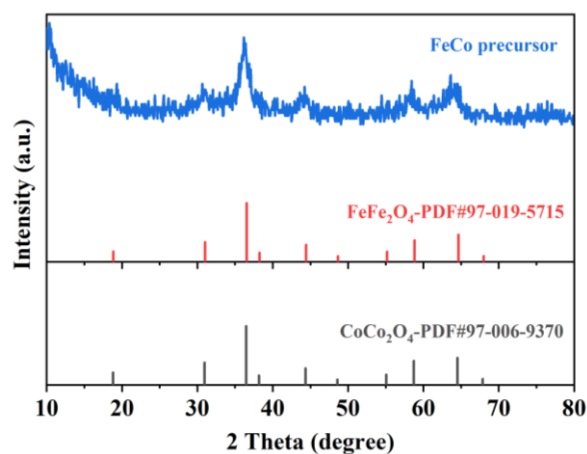

Fig. S2 The XRD spectra of FeCo precursor.

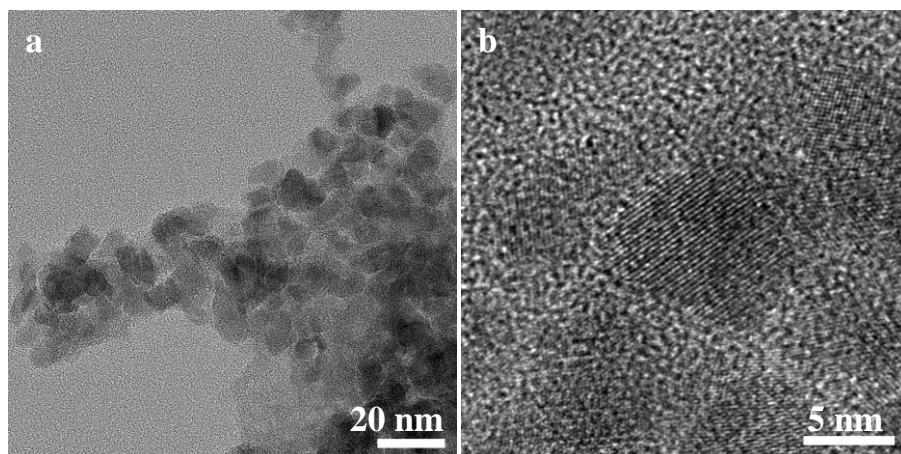

Fig. S3 The TEM of a-FeCoS<sub>4</sub> at 350 °C.

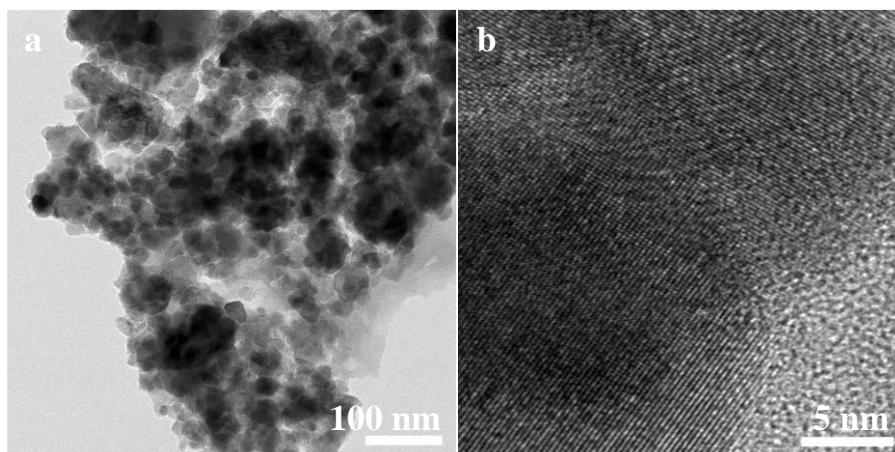

Fig. S4 The TEM of FeCoS<sub>4</sub> 450 °C.

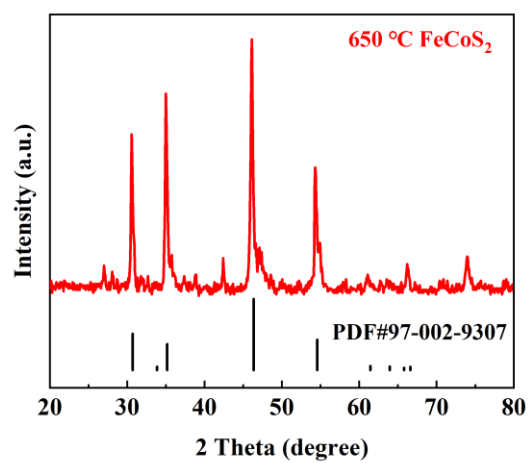

Fig. S5 The XRD spectra of FeCoS<sub>2</sub>.

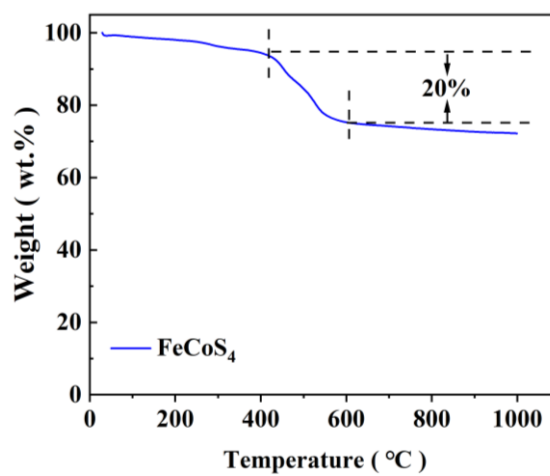

Fig. S6 The thermal gravimetric analysis (TGA) of FeCoS<sub>4</sub> in an argon atmosphere.

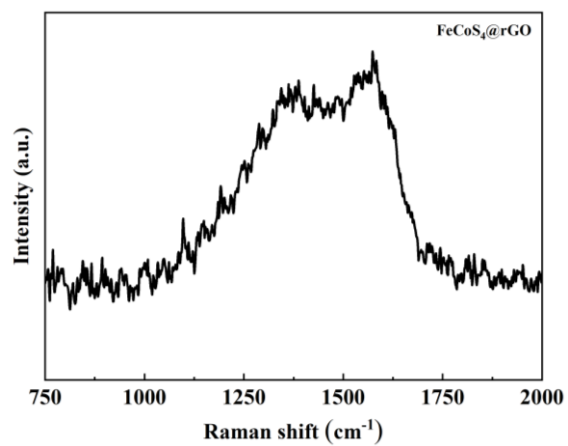

Fig. S7 The Raman spectra of FeCoS<sub>4</sub>@rGO.

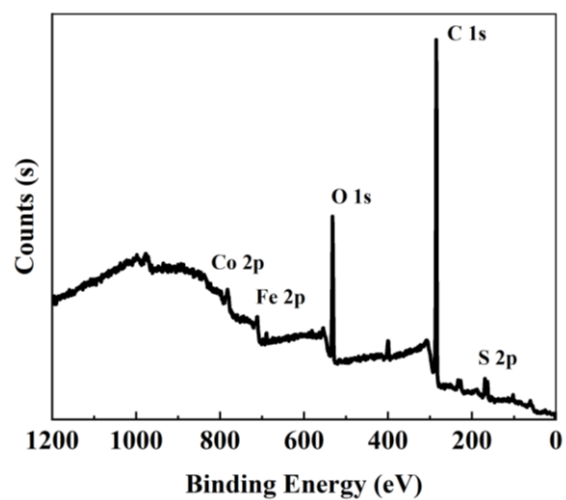

Fig. S8 The XPS full spectrum of FeCoS<sub>4</sub>@rGO.

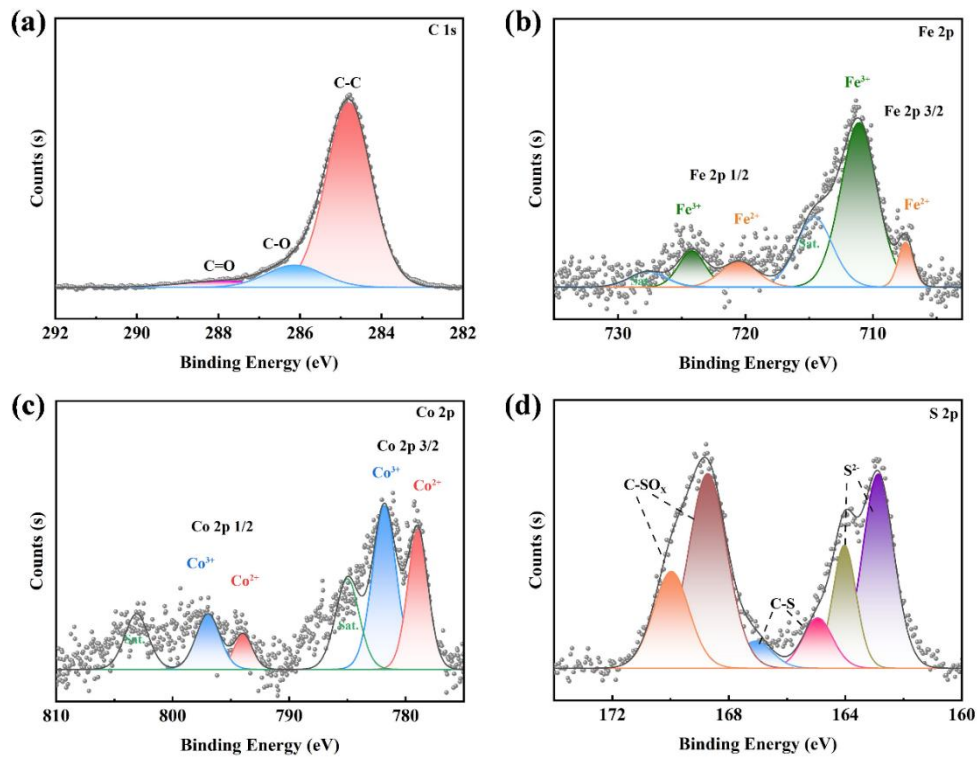

Fig.S9 High-resolution C 1s (a), Fe 2p (b), Co 2p (c), and S 2p (d) XPS spectra of FeCoS<sub>4</sub>@rGO.

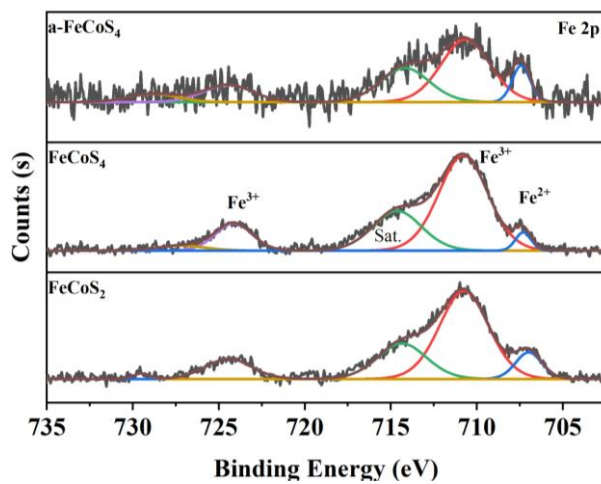

Fig. S10 The high-resolution XPS spectra of Fe 2p in bimetallic sulfides for a-FeCoS<sub>4</sub>, FeCoS<sub>4</sub>, and FeCoS<sub>2</sub>.

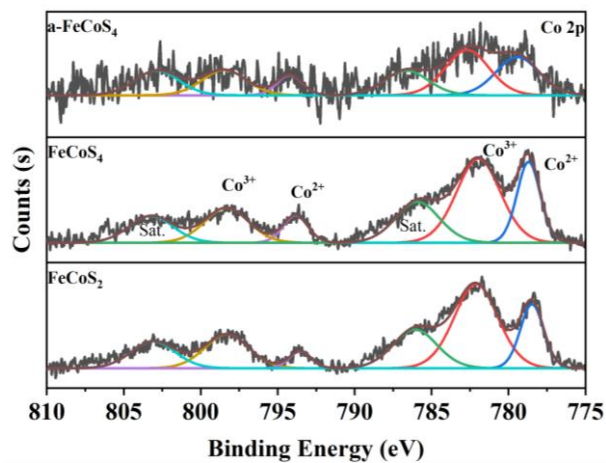

Fig. S11 The high-resolution XPS spectra of Co 2p in bimetallic sulfides for a-FeCoS<sub>4</sub>, FeCoS<sub>4</sub>, and FeCoS<sub>2</sub>.

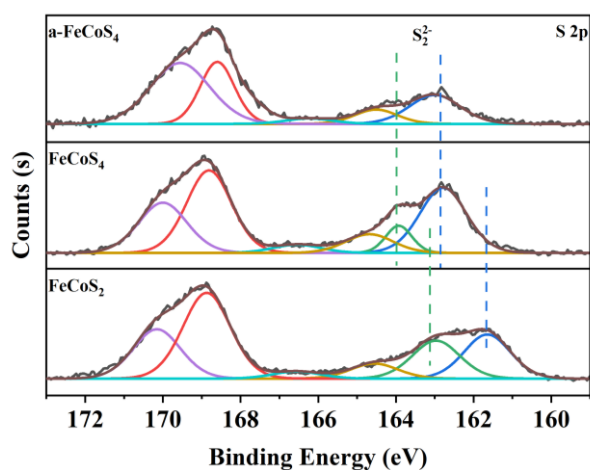

Fig. S12 The high-resolution XPS spectra of S 2p in bimetallic sulfides for a-FeCoS<sub>4</sub>, FeCoS<sub>4</sub>, and FeCoS<sub>2</sub>.

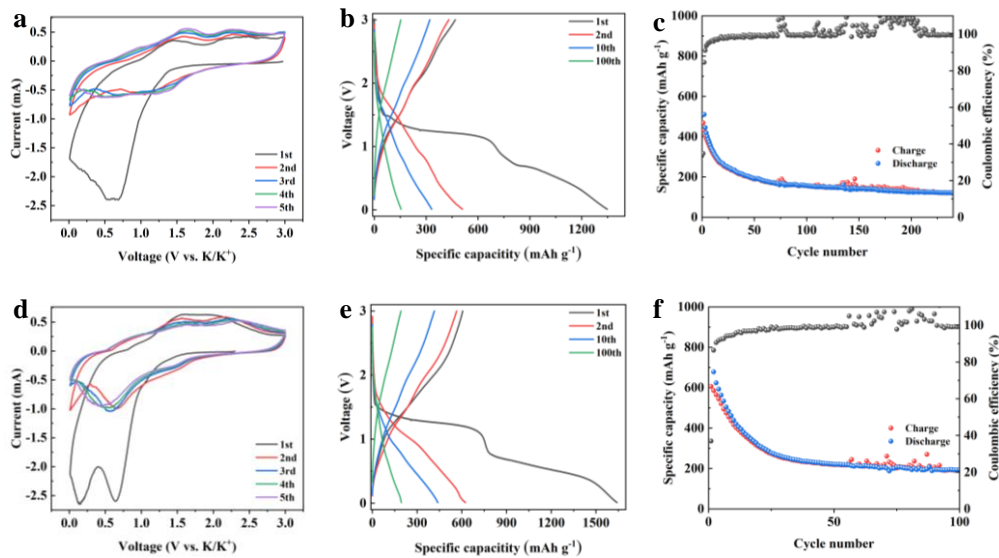

Fig. S13 The CV curves, charge-discharge curves and cycling performance for a-FeCoS<sub>4</sub> (a-c) and FeCoS<sub>2</sub> (d-f).

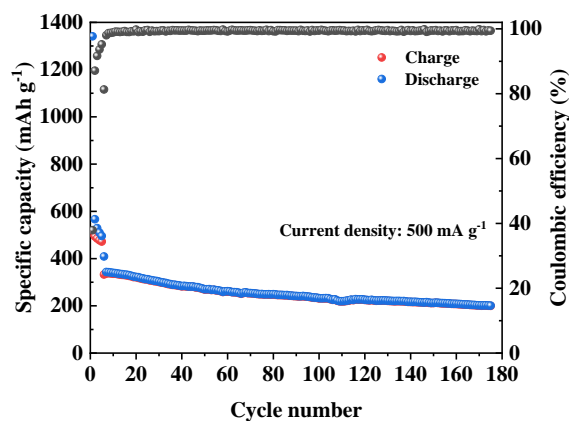

Fig. S14 Cycling performance for FeCoS<sub>4</sub>@rGO at 500 mA g<sup>-1</sup>.

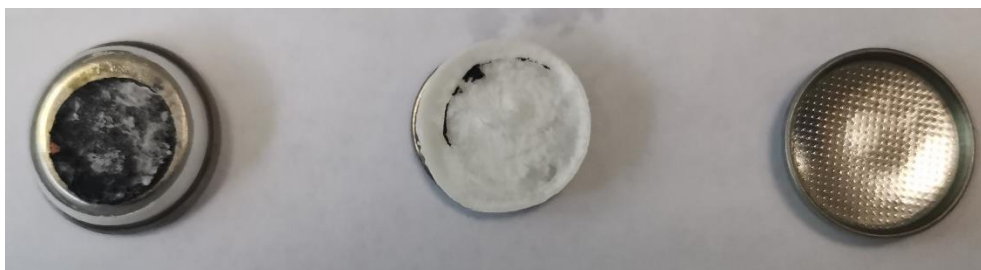

Fig. 15 Digital photo of a disassembled battery showing capacity fluctuations during cycling.



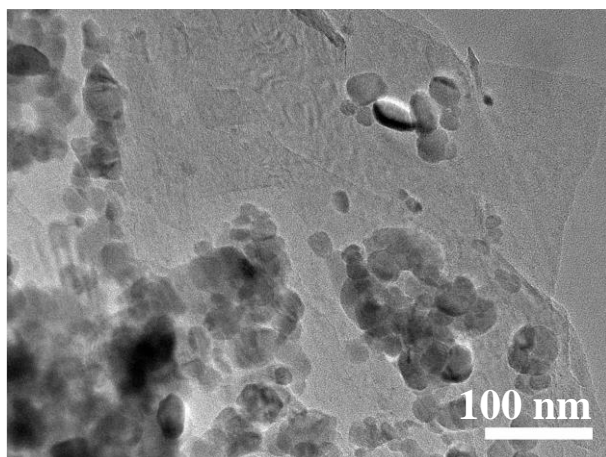

Fig. S16 TEM image of FeCoS<sub>4</sub>@rGO electrode after 50 cycles.

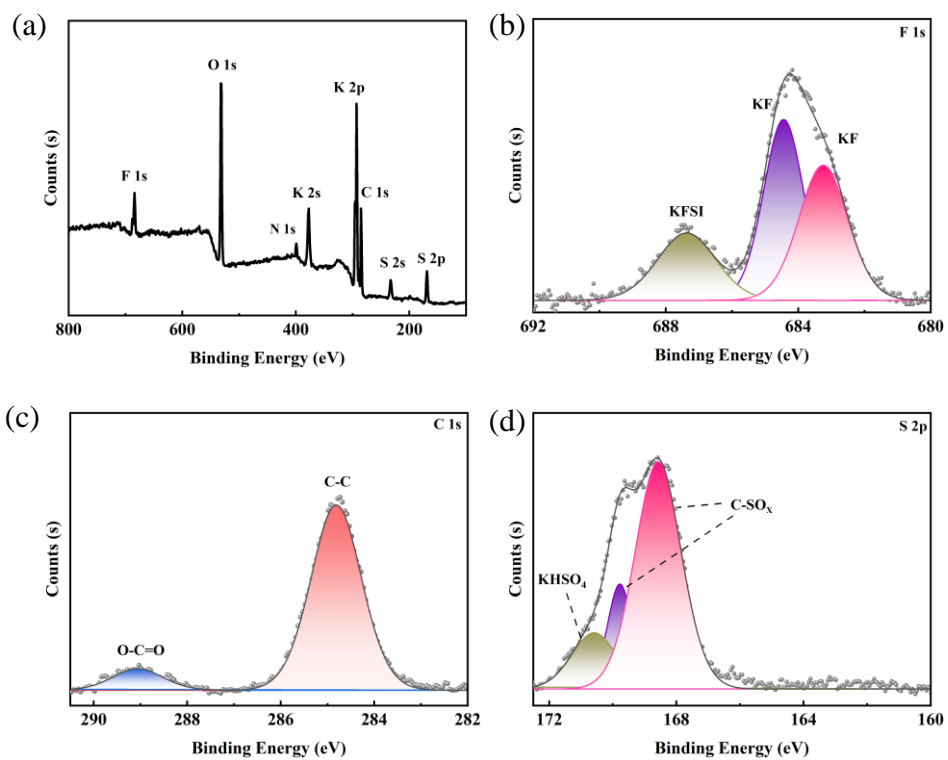

Fig. S17 XPS analysis of FeCoS<sub>4</sub>@rGO after 10 cycles.

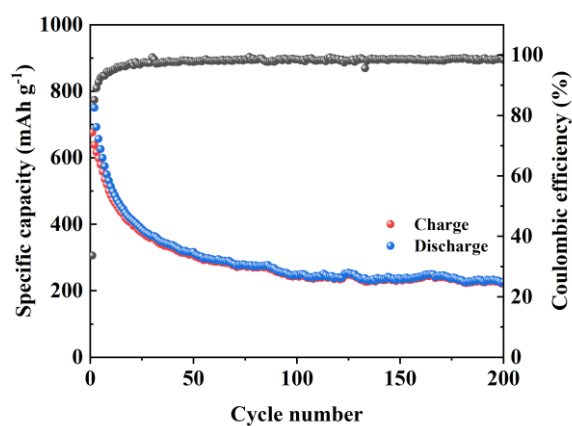

Fig. S18 The cycling performance for FeCoS<sub>4</sub> at 50 mA g<sup>-1</sup>.

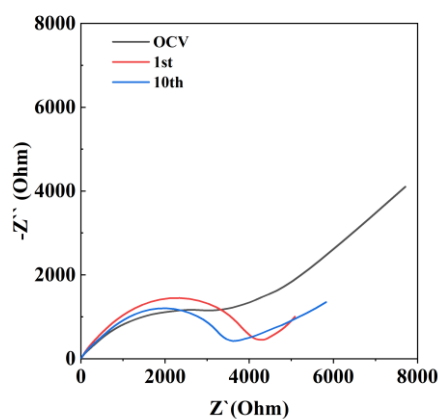

Fig. S19 The EIS plots of FeCoS<sub>4</sub> at different states.

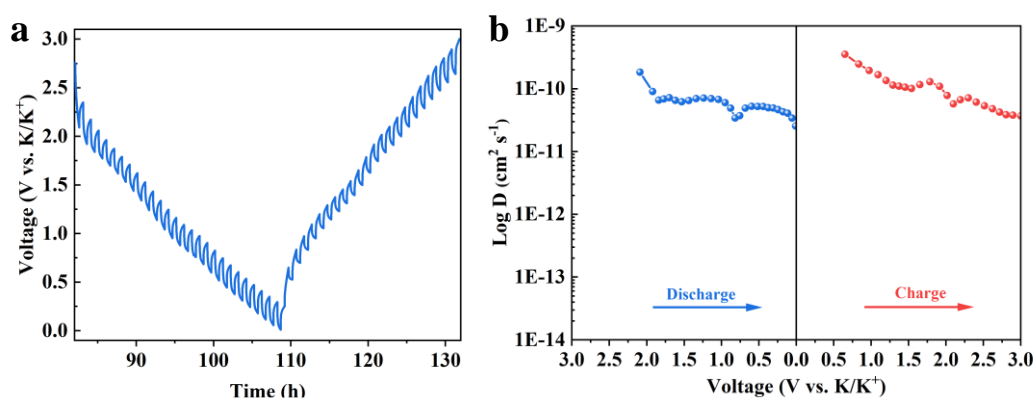

Fig. S20  $D_{K-ion}$  of FeCoS<sub>4</sub>@rGO electrodes calculated at different potassiation and de-potassiation process for 2nd cycle.

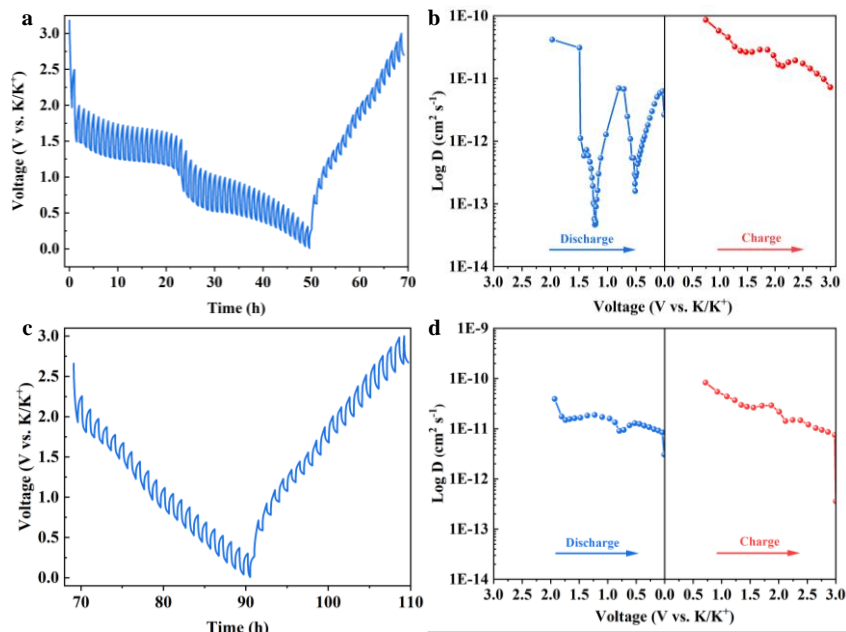

Fig. S21 The time-voltage curve (a and c) and  $D_{K-ion}$  (b and d) of  $FeCoS_4$  electrodes for 1st and 2nd cycle.

Table S1 The PIB performance compares with reported results.

| Material             | Voltage range (V) | Current ( $mA\ g^{-1}$ ) | Discharge capacity ( $mAh\ g^{-1}$ ) | Cycle number | Rate capacity ( $mAh\ g^{-1}$ ) | Ref.             |
|----------------------|-------------------|--------------------------|--------------------------------------|--------------|---------------------------------|------------------|
| $FeCoS_4@rGO$        | 0.01-3            | 50                       | 404                                  | 100          | 246<br>( $1\ A\ g^{-1}$ )       | <b>This work</b> |
| $NiS_2/rGO$          | 0.1-2             | 50                       | 320                                  | 100          | 94<br>( $6.4\ A\ g^{-1}$ )      | 5                |
| $MoS_2@C$ nanosheets | 0.01-3            | 100                      | 280.6                                | 100          | 51<br>( $2\ A\ g^{-1}$ )        | 6                |
| $ZnS@C$              | 0.01-3            | 100                      | 310                                  | 100          | 150<br>( $5\ A\ g^{-1}$ )       | 7                |
| $Ti_3C_2-Sb_2S_3$    | 0.01-2            | 100                      | 386                                  | 500          | 102<br>( $2\ A\ g^{-1}$ )       | 8                |
| $Co_9S_8/N-C@MoS_2$  | 0.01-3            | 1000                     | 100                                  | 100          | 100<br>( $1\ A\ g^{-1}$ )       | 9                |
| $GeV_4S_8$           | 0.01-3            | 200                      | 364.3                                | 100          | 184<br>( $5\ A\ g^{-1}$ )       | 10               |
| $FeCoS_2@rGO$        | 0.01-3            | 100                      | 371.5                                | 150          | 182<br>( $2\ A\ g^{-1}$ )       | 11               |
| $SnS@C/rGO$          | 0.3-2             | 800                      | 176                                  | 50           | 211<br>( $0.8\ A\ g^{-1}$ )     | 12               |

## References

- (1) Kresse, G.; Hafner, J. Ab initio molecular dynamics for liquid metals. *Physical review B* **1993**, *47* (1), 558. Kresse, G.; Hafner, J. Ab initio molecular-dynamics simulation of the liquid-metal–amorphous-semiconductor transition in germanium. *Physical Review B* **1994**, *49* (20), 14251.
- (2) Perdew, J. P.; Burke, K.; Ernzerhof, M. Generalized gradient approximation made simple. *Phys. Rev. Lett.* **1996**, *77* (18), 3865.
- (3) Blöchl, P. E. Projector augmented-wave method. *Physical review B* **1994**, *50* (24), 17953.
- (4) Grimme, S.; Antony, J.; Ehrlich, S.; Krieg, H. A consistent and accurate ab initio parametrization of density functional dispersion correction (DFT-D) for the 94 elements H-Pu. *The Journal of chemical physics* **2010**, *132* (15).
- (5) Zheng, H.; Chen, X.; Li, L.; Feng, C.; Wang, S. Synthesis of NiS<sub>2</sub>/reduced graphene oxide nanocomposites as anodes materials for high-performance Sodium and Potassium ion batteries. *Mater. Res. Bull.* **2021**, *142*. DOI: 10.1016/j.materresbull.2021.111430.
- (6) Chen, L.; Chen, Z.; Xiang, T.; Wang, X.; Feng, S.; Yang, S.; Wang, Z.; Feng, Z.; Li, X.; Huang, J. Expanded MoS<sub>2</sub>@C nanosheets by three-roll milling for high-performance potassium ion batteries. *FlatChem* **2023**, *40*. DOI: 10.1016/j.flatc.2023.100520.
- (7) Gan, Y.; Mu, M.; Li, M.; Ma, X.; Yuan, J.; He, H.; Li, X.; Mou, J.; Zhang, C.; Zhang, X.; et al. Trumpet-Like ZnS@C Composite for High-Performance Potassium Ion Battery Anode. *Chemistry* **2023**, *29* (32), e202300373. DOI: 10.1002/chem.202300373.
- (8) Wang, T.; Shen, D.; Liu, H.; Chen, H.; Liu, Q.; Lu, B. A Sb<sub>2</sub>S<sub>3</sub> Nanoflower/MXene Composite as an Anode for Potassium-Ion Batteries. *ACS Appl Mater Interfaces* **2020**, *12* (52), 57907-57915. DOI: 10.1021/acsami.0c18285.
- (9) Han, Y.; Li, W.; Zhou, K.; Wu, X.; Wu, H.; Wu, X.; Shi, Q.; Diao, G.; Chen, M. Bimetallic Sulfide Co<sub>9</sub>S<sub>8</sub>/N-C@MoS<sub>2</sub> Dodecahedral Heterogeneous Nanocages for Boosted Li/K Storage. *ChemNanoMat* **2019**, *6* (1), 132-138. DOI: 10.1002/cnma.201900601.

- (10) Chen, W.; Hu, K.; Zheng, H.; Pan, Y.; Lv, Z.; Tu, X.; Zheng, C.; He, T.; Huang, F.; Dong, W. GeV(4) S(8) : a Novel Bimetallic Sulfide for Robust and Fast Potassium Storage. *Small* **2024**, e2311638. DOI: 10.1002/sml.202311638.
- (11) Chen, X.; Cheng, N.; Zhang, L.; Xiang, G.; Ding, Y.-L.; Liu, Z. Flower-like spherical FeCoS<sub>2</sub> coated by reduced graphene oxide as anode for high performance potassium ion storage. *J. Alloys Compd.* **2021**, 861. DOI: 10.1016/j.jallcom.2020.158458.
- (12) Hu, R.; Zhu, K.; Ye, K.; Yan, J.; Wang, Q.; Cao, D.; Wang, G. Influence of potential range selection on the SnS@C/rGO anodes in potassium ion battery. *Appl. Surf. Sci.* **2021**, 536. DOI: 10.1016/j.apsusc.2020.147832.
